# Supplementary material for: Dess–Martin periodinane-mediated oxidation of the primary alcohol of cytidine into a carboxylic acid
Source: Royal Society of Chemistry journal article supplement (doi:10.1039/d4ob00240g), 2024-01-01

## Supporting information

### Dess-Martin Periodinane-mediated oxidation of the primary alcohol of cytidine into a carboxylic acid

Alexandra Serre<sup>1</sup>, Vibhu Jha<sup>2,3</sup>, Adèle Rivault<sup>1</sup>, Leif A. Eriksson<sup>2</sup>, Goreti Ribeiro  
Morais<sup>1</sup>, Robert A. Falconer<sup>1\*</sup>

<sup>1</sup>*Institute of Cancer Therapeutics, Faculty of Life Sciences, University of Bradford, Bradford BD7 1DP,  
U.K.*

<sup>2</sup>*Department of Chemistry and Molecular Biology, University of Gothenburg, 405 30 Göteborg,  
Sweden.*

<sup>3</sup>*Current address: Institute of Cancer Therapeutics, University of Bradford.*

Email: [r.a.falconer1@bradford.ac.uk](mailto:r.a.falconer1@bradford.ac.uk)

#### Table of contents

|                                                                                                                                                     |     |
|-----------------------------------------------------------------------------------------------------------------------------------------------------|-----|
| <b>Table S1</b> Oxidation of compound <b>1a</b> . Detected masses and AUC of products by LCMS chromatogram under different conditions .....         | S6  |
| <b>Figure S1</b> LCMS chromatogram of products of oxidation of compound <b>1a</b> .....                                                             | S6  |
| <b>Table S2</b> Oxidation of compound <b>1a</b> with 2 eq. of DMP. Detected masses and AUC of products by LCMS chromatogram before extraction ..... | S7  |
| <b>Figure S2</b> LCMS chromatogram of products of oxidation of compound <b>1a</b> before extraction .....                                           | S7  |
| <b>Figure S3</b> <sup>1</sup> H NMR spectra of DMP from different batches .....                                                                     | S8  |
| <b>Figure S4</b> Oxidation of compound <b>1a</b> with DMP under different conditions .....                                                          | S9  |
| <b>Table S3</b> Oxidation of compound <b>1a</b> with 2 eq. DMP. Detected masses and AUC of products by LCMS chromatogram after extraction .....     | S10 |

|                                                                                                                                                                                                                                   |     |
|-----------------------------------------------------------------------------------------------------------------------------------------------------------------------------------------------------------------------------------|-----|
| <b>Figure S5</b> LCMS chromatogram of products of oxidation of compound <b>1a</b> after extraction .....                                                                                                                          | S10 |
| <b>Figure S6</b> LCMS chromatogram of products of oxidation of compound <b>1a</b> with 2 eq. DMP and modification of mobile phase .....                                                                                           | S11 |
| <b>Figure S7</b> Comparison between initial coordinates and the coordinates after DFT calculation of <b>1a</b> and hydrate intermediate <b>3a</b> showing conformational changes....                                              | S12 |
| <b>Figure S8</b> RMSD analysis from the 200 ns MD simulations of <b>1a</b> and the hydrate intermediate of <b>3a</b> .....                                                                                                        | S12 |
| <b>Figure S9</b> MD simulation analysis of <b>1a</b> .....                                                                                                                                                                        | S13 |
| <b>Figure S10</b> MD simulation analysis of the hydrate intermediate of <b>3a</b> .....                                                                                                                                           | S13 |
| <b>Table S4</b> Oxidation of compound <b>2</b> . Detected masses and AUC of products by LCMS chromatogram under different conditions .....                                                                                        | S14 |
| <b>Figure S11</b> LCMS chromatogram of products of oxidation of compound <b>2</b> .....                                                                                                                                           | S14 |
| <b>Table S5</b> Oxidation of compound <b>1c</b> . Detected masses and AUC of products by LCMS chromatogram under different conditions .....                                                                                       | S15 |
| <b>Figure S12</b> LCMS chromatogram of products of oxidation of compounds <b>1c</b> .....                                                                                                                                         | S15 |
| <b>Figure S13A</b> <sup>1</sup> H NMR spectra of aldehyde <b>3c</b> .....                                                                                                                                                         | S16 |
| <b>Figure S13B</b> <sup>1</sup> H NMR spectra of mixture aldehyde <b>3c</b> and methyl hemiacetal <b>4c</b> ..                                                                                                                    | S16 |
| <b>Figure S14</b> Comparison between initial coordinates of cytidine analogue <b>1c</b> and its coordinate after DFT calculation; superposed initial coordinates and the coordinates after the DFT calculation of <b>1c</b> ..... | S17 |
| <b>Table S6</b> Oxidation of compound <b>1b</b> . Detected masses and AUC of products by LCMS chromatogram under different conditions .....                                                                                       | S18 |
| <b>Figure S15</b> LCMS chromatogram of products of oxidation of compounds <b>1b</b> .....                                                                                                                                         | S18 |
| <b>Figure S16</b> Representative structures from the MD simulation of cytidine analogue <b>1a</b> , hydrate intermediate of <b>3a</b> , and cytidine analogue <b>1c</b> .....                                                     | S19 |
| <b>Figure S17</b> <sup>1</sup> H NMR spectra of methyl riboside <b>11</b> ; methyl riboside <b>11</b> with 2eq. DMP; methyl riboside <b>11</b> with 4 eq. DMP .....                                                               | S20 |
| <b>Table S7</b> Oxidation of methyl riboside <b>12</b> . Detected masses and AUC of products by LCMS chromatogram under different conditions .....                                                                                | S21 |

|                                                                                               |     |
|-----------------------------------------------------------------------------------------------|-----|
| <b>Figure S18</b> LCMS chromatogram of products of oxidation of methyl riboside <b>12</b> ... | S21 |
| <b>Figure S19</b> LCMS gradient.....                                                          | S22 |
| <b>Figure S20</b> Characterisation of compound <b>5a</b> .....                                | S23 |
| <b>Figure S21</b> Characterisation of compound <b>6a</b> .....                                | S25 |
| <b>Figure S22</b> Characterisation of compound <b>2</b> .....                                 | S27 |

## General information

All chemicals were provided by Sigma Aldrich or Fluorochem. All reactions were monitored by thin-layer chromatography (TLC silica gel 60 F<sub>254</sub>, aluminium) and/or by LC/MS (Waters Alliance e2695 separation modules, Waters 2998 photodiode array (PDA) detector 280 nm, Waters Acquity QDA mass detector, Hichrom C<sub>18</sub> 3.5 μM, 2.1 x 150 mm) according to the following methods (**Figure S19**, supporting data). Novel compound **2** was synthesized similarly to compound **1a**.<sup>25</sup> NMR spectra were recorded on a Bruker AMX 400 NMR spectrometer and are reported in parts per million (ppm) on the δ scale relative to residual CDCl<sub>3</sub> (δ 7.25 or δ 77.0), CD<sub>3</sub>OD (δ 3.31 or δ 49.00) or DMSO-*d*<sub>6</sub> (δ 2.50 or δ 39.52). Spectral assignments were accomplished using 2D COSY and HSQC experiments. High-resolution mass spectrometry was recorded using a Thermo scientific, LTQ Orbitrap no. 01289B, Electrospray. Column chromatography was performed using silica gel (230-400 mesh)

**General Procedure for the oxidation of 5'-hydroxy cytidine to 5'-aldehyde cytidine:** To a stirred solution of alcohol (25 mg, 1 eq.) in dry CH<sub>2</sub>Cl<sub>2</sub> (2.5 mL) was added DMP (2 eq.) and the mixture was stirred at room temperature. After 2 hours, the mixture was diluted with CH<sub>2</sub>Cl<sub>2</sub> (20 mL) and washed with sodium thiosulfate (2 x 20 mL), water (2 x 20 mL) and brine (2 x 20 mL). The organic phases were combined and dried over anhydrous Mg<sub>2</sub>SO<sub>4</sub>, filtered, and concentrated under reduced pressure. LCMS analysis of the crude indicated the following yields of **3a** 68%; **3b** 93%; **3c** > 95%; **7** 59%.

**General Procedure for the oxidation of 5'-hydroxy cytidine to 5'-carboxylic acid cytidine:** To a stirred solution of protected 5'-hydroxy cytidine (25 mg, 1 eq.) in dry CH<sub>2</sub>Cl<sub>2</sub> (2.5 mL) was

added DMP (4 eq.) and the mixture was stirred at room temperature. After 2 hours, the mixture was further diluted with CH<sub>2</sub>Cl<sub>2</sub> (20 mL) and washed with sodium thiosulfate (2 x 20 mL), water (2 x 20 mL) and brine (2 x 20 mL). The organic phases were combined and dried over anhydrous Mg<sub>2</sub>SO<sub>4</sub>, filtered, and concentrated under reduced pressure. LCMS analysis of the crude indicated the following yields of **5a** 79%; **5b** 96%; **5c** 42%; **8** 95%.

**(2S,3S,4R,5R)-5-(4-(((benzyloxy)carbonyl)amino)-2-oxopyrimidin-1(2H)-yl)-3,4-bis(((benzyloxy)carbonyl)oxy)tetrahydrofuran-2-carboxylic acid (5a)** – Column chromatography on silica gel CH<sub>2</sub>Cl<sub>2</sub>/MeOH/AcOH (97/2/1) afforded **5a** as white solid,  $\eta$  = 67%; <sup>1</sup>H NMR (400 MHz, DMSO-*d*<sub>6</sub>)  $\delta$  10.98 (s, 1H), 8.37 (d, 1H, H<sub>6</sub>, *J* = 7.6 Hz, 1H), 7.44 – 7.30 (m, 15H, Cbz-Ph), 7.09 (d, 1H, H<sub>5</sub>, *J* = 7.6 Hz, 1H), 6.06 (d, 1H, H<sub>1'</sub>, *J* = 4.1 Hz), 5.74 (dd, 1H, H<sub>3'</sub>, *J* = 5.7, 4.7 Hz), 5.54 (dd, 1H, H<sub>2'</sub>, *J* = 5.7, 4.1 Hz), 5.20 (s, 2H, Cbz-(N)-CH<sub>2</sub>), 5.17 (s, 2H, Cbz-(O)-CH<sub>2(1)</sub>), 5.10 (s, 2H, Cbz-(O)-CH<sub>2(2)</sub>), 4.74 (d, 1H, H<sub>4'</sub>, *J* = 4.7 Hz); <sup>13</sup>C{<sup>1</sup>H} NMR (101 MHz, DMSO)  $\delta$  169.8 (s, C<sub>5'</sub>), 146.7 (s, C<sub>6</sub>), 128.5 (m, Cbz-Ph), 95.1 (s, C<sub>5</sub>), 90.7 (s, C<sub>1'</sub>), 79.7 (s, C<sub>4'</sub>), 76.4 (s, C<sub>2'</sub>), 75.6 (s, C<sub>3'</sub>), 69.8 (s, Cbz-(O)CH<sub>2</sub>), 69.7 (s, Cbz-(O)CH<sub>2</sub>), 66.7 (s, Cbz-(N)CH<sub>2</sub>); Rt = 19.97 min (method 1, UV 254 nm, [M+H]<sup>+</sup> = 660); HRMS (ESI) *m/z*: [M+H]<sup>+</sup> calcd for C<sub>33</sub>H<sub>29</sub>N<sub>3</sub>O<sub>12</sub> 660.1830; found 660.1849.

**Synthesis of methyl (2S,3S,4R,5R)-5-(4-(((benzyloxy)carbonyl)amino)-2-oxopyrimidin-1(2H)-yl)-3,4-bis(((benzyloxy)carbonyl)oxy)tetrahydrofuran-2-carboxylate (6a)** – crude of compound **5a** (25 mg) was dissolved in methanol (2 ml) and stirred with Amberlite IR-120 at room temperature overnight. Then the resin was filtered, and the filtrate evaporated. Column chromatography on silica gel afford **6a** as a white solid,  $\eta$  = 91%; <sup>1</sup>H NMR (400 MHz, CDCl<sub>3</sub>)  $\delta$  8.43 (d, 1H, H<sub>6</sub>, *J* = 7.5 Hz, 1H), 7.42 – 7.29 (m, 16H, Cbz-Ph and H<sub>5</sub>), 6.27 (d, 1H, H<sub>1'</sub>, *J* = 3.4 Hz), 5.45 (m, 2H, H<sub>2'</sub> and H<sub>3'</sub>), 5.23 (s, 2H, Cbz-(N)-CH<sub>2</sub>), 5.14 (s, 2H, Cbz-(O)CH<sub>2(1)</sub>), 5.12 (m, 2H, Cbz-(O)CH<sub>2(2)</sub>), 4.75 (d, 1H, H<sub>4'</sub>, *J* = 3.9 Hz), 3.81 (s, 3H, OCH<sub>3</sub>); <sup>13</sup>C{<sup>1</sup>H} NMR (101 MHz, CDCl<sub>3</sub>)  $\delta$  169.7 (s, C<sub>5'</sub>), 145.3 (s, C<sub>6</sub>), 128.7 (m, Cbz-Ph), 95.5 (s, C<sub>5</sub>), 89.9 (s, C<sub>1'</sub>), 79.7 (s, C<sub>4'</sub>), 77.4 (s, C<sub>2'</sub>), 75.6 (s, C<sub>3'</sub>), 70.9 (s, Cbz-(O)CH<sub>2</sub>), 70.8 (s, Cbz-(O)CH<sub>2</sub>), 68.3 (s, Cbz-(N)CH<sub>2</sub>); Rt = 11.69 min (method 2, UV 254 nm, [M+H]<sup>+</sup> = 674); HRMS (ESI) *m/z*: [M+H]<sup>+</sup> calcd for C<sub>34</sub>H<sub>31</sub>N<sub>3</sub>O<sub>12</sub> 674.1986; found 674.1979.

**Benzyl** (1-((2*R*,4*S*,5*R*)-4-(((benzyloxy)carbonyloxy)-5-(hydroxymethyl)tetrahydrofuran-2-yl)-2-oxo-1,2-dihydropyrimidin-4-yl)carbamate (**2**) - Column chromatography on silica gel afford **2** as a white solid, overall  $\eta$  = 59% (3 steps);  $^1\text{H}$  NMR (400 MHz,  $\text{CDCl}_3/\text{MeOD}$ )  $\delta$  8.31 (d, 1H,  $\text{H}_6$ ,  $J$  = 7.5 Hz, 1H), 7.40 – 7.25 (m, 11H, Cbz-Ph and  $\text{H}_5$ ), 6.22 (dd, 1H,  $\text{H}_{1'}$ ,  $J$  = 7.9, 5.8 Hz), 5.24 – 5.20 (m, 2H,  $\text{H}_{2'}$ ), 4.26 – 4.19 (m, 1H,  $\text{H}_{3'}$ ), 5.18 (s, 2H, Cbz-(N)- $\text{CH}_2$ ), 5.14 (s, 2H, Cbz-(O) $\text{CH}_2$ ), 3.81 (m, 1H,  $\text{H}_{4'}$ ), 2.67 (m, 1H,  $\text{H}_{5'}$ ), 2.25 (m, 1H,  $\text{H}_{5'}$ );  $^{13}\text{C}\{^1\text{H}\}$  NMR (101 MHz,  $\text{CDCl}_3$ )  $\delta$  144.9 (s,  $\text{C}_6$ ), 128.8 (m, Cbz-Ph), 96.3 (s,  $\text{C}_5$ ), 87.8 (s,  $\text{C}_{1'}$ ), 86.2 (s,  $\text{C}_{4'}$ ), 79.0 (s,  $\text{C}_{2'}$ ), 78.0 (s,  $\text{C}_{3'}$ ), 70.4 (s, Cbz-(O) $\text{CH}_2$ ), 68.1 (s, Cbz-(N) $\text{CH}_2$ ), 62.0 (s,  $\text{C}_{5'}$ );  $R_t$  = 10.70 min (method 2, UV 254 nm,  $[\text{M}+\text{H}]^+ = 496$ ); HRMS (ESI)  $m/z$ :  $[\text{M}+\text{H}]^+$  calcd for  $\text{C}_{25}\text{H}_{25}\text{N}_3\text{O}_3$  496.1720; found 496.1708.

**Table S1.** Oxidation of compound **1a**. Detected masses and AUC of products by LCMS chromatogram under different conditions. **A**) 2 eq. of previously opened DMP (>3 months); **B**) 2 eq. of new DMP or 4 eq. of previously opened DMP; **C**) 4 eq. of new DMP

$1a \rightarrow 3a + 5a + 6a$   
 $3a: X = H$   
 $5a: X = OH$   
 $6a: X = OMe$

| Figure | Compound  | Retention time (min.) | [M+H] <sup>+</sup> | % AUC <sup>1</sup> |
|--------|-----------|-----------------------|--------------------|--------------------|
| A      | <b>1a</b> | 20.53                 | 646                | 20                 |
|        | <b>4a</b> | 20.77, 21.10          | 676                | 80                 |
| B      | <b>5a</b> | 19.65                 | 660                | 31                 |
|        | <b>1a</b> | 20.48                 | 646                | 3                  |
|        | <b>4a</b> | 20.78, 21.09          | 676                | 66                 |
| C      | <b>5a</b> | 19.84                 | 660                | 79                 |
|        | <b>4a</b> | 20.78, 20.99          | 676                | 15                 |

<sup>1</sup>Conversion was calculated based on the area under curve (AUC) of compounds from the HPLC chromatogram below and method 1 (Figure S19).

**Figure S1.** LCMS chromatogram (diode array detection, method 1, UV 280 nm) of products of oxidation of compound **1a** under different conditions

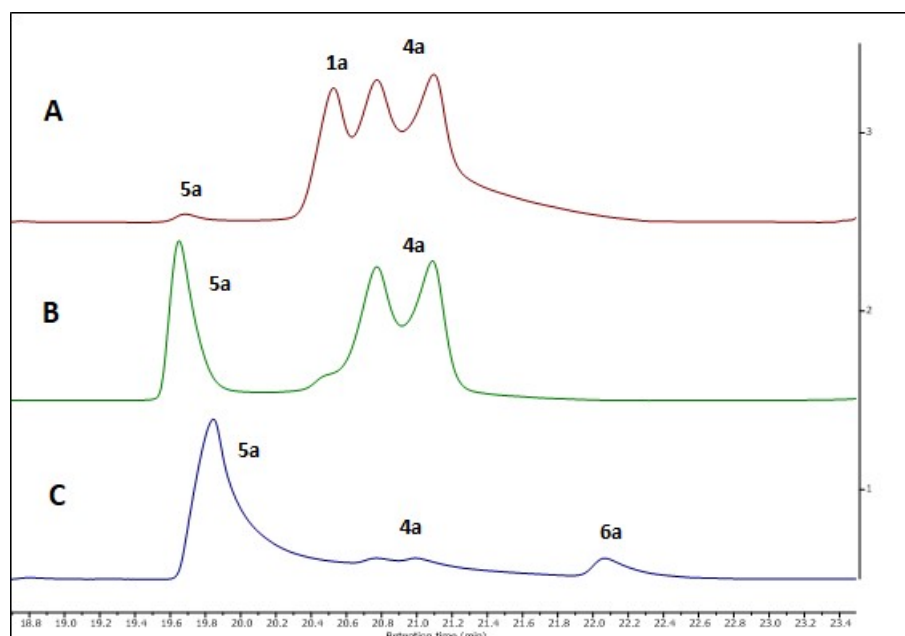

**Table S2.** Oxidation of compound **1a** with 2 eq. of DMP. Detected masses and AUC of products by LCMS chromatogram before extraction. LCMS sample prepared in **A)** MeOH; **B)** MeCN

$1a \xrightarrow{\text{DMP}} 3a + 4a + 5a$

**3a:** X = H  
**5a:** X = OH  
**6a:** X = OMe

| Figure   | Compound  | Retention time (min.) | [M+H] <sup>+</sup> | % AUC <sup>1</sup> |
|----------|-----------|-----------------------|--------------------|--------------------|
| <b>A</b> | <b>5a</b> | 20.12                 | 660                | 18                 |
|          | <b>4a</b> | 21.11, 21.37          | 676                | 67                 |
|          | <b>6a</b> | 22.44                 | 674                | 15                 |
| <b>B</b> | <b>5a</b> | 20.12                 | 660                | 36                 |
|          | <b>4a</b> | 21.11, 21.36          | 676                | 64                 |

<sup>1</sup>Conversion was calculated based on the area under curve (AUC) of compounds from the HPLC chromatogram below and method 1 (**Figure S19**).

**Figure S2.** LCMS chromatogram (diode array detection, method 1, UV 280 nm) of products of oxidation of compound **1a** before extraction. LCMS sample prepared in **A)** MeOH; **B)** MeCN

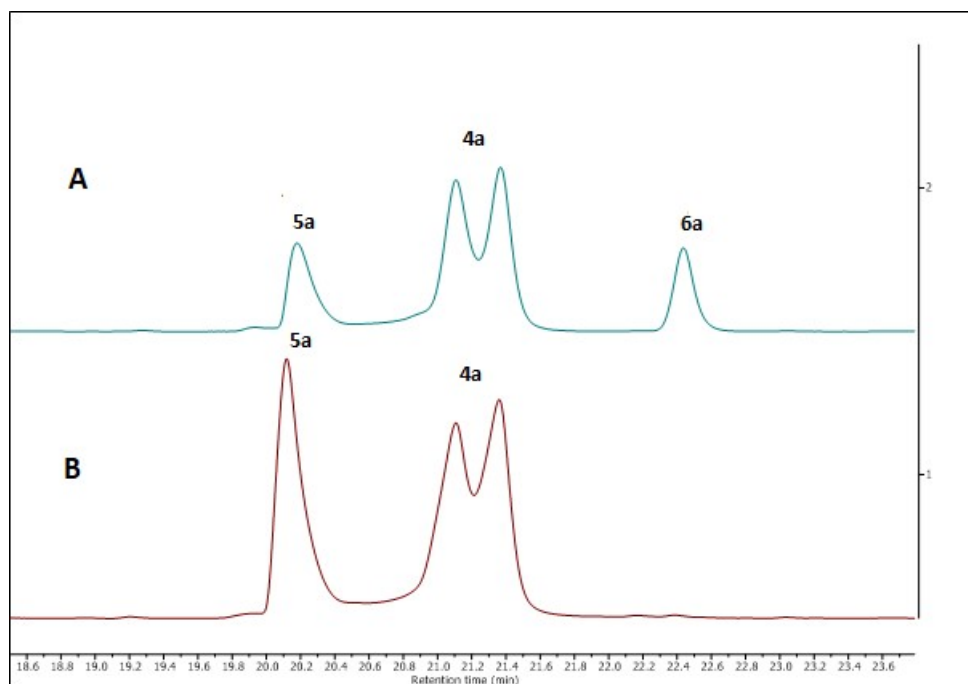

**Figure S3.**  $^1\text{H}$  NMR (400 MHz,  $\text{DMSO-}d_6$ ) spectra of DMP from different batches

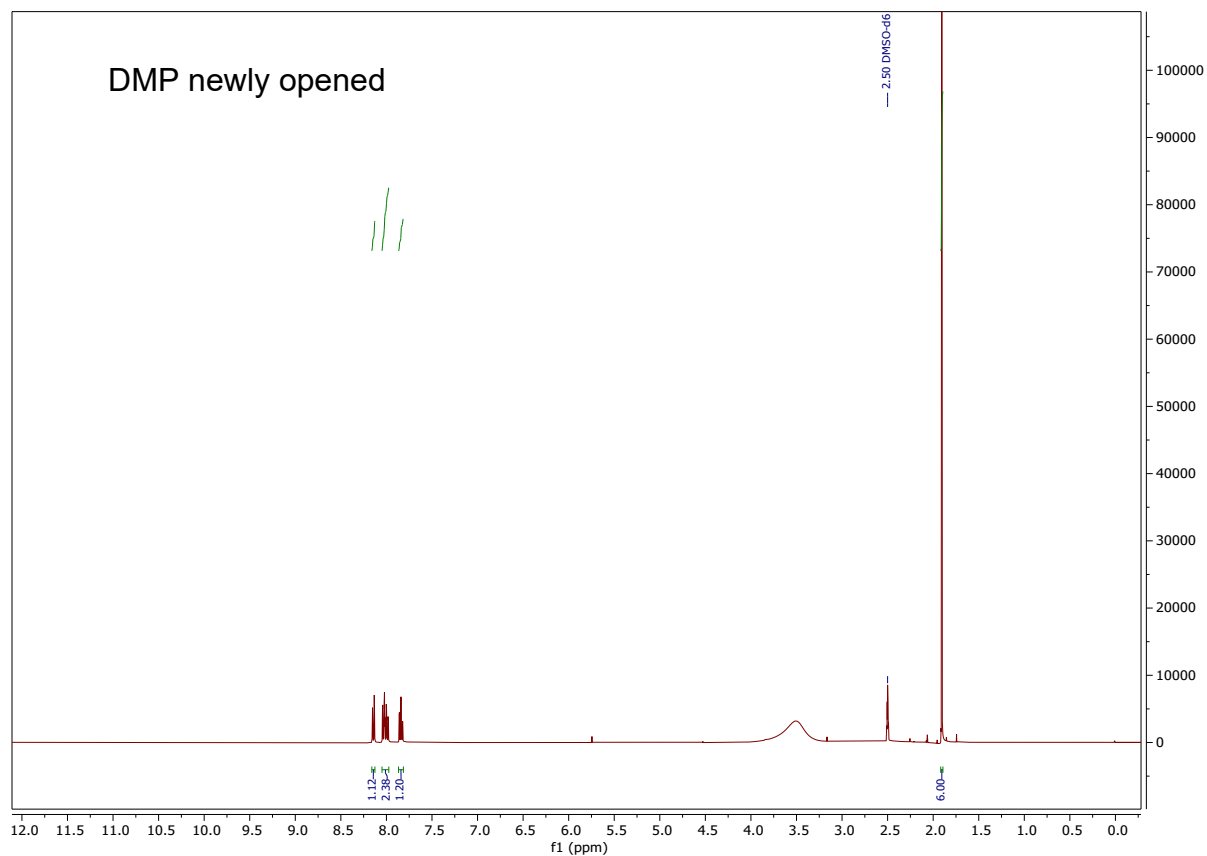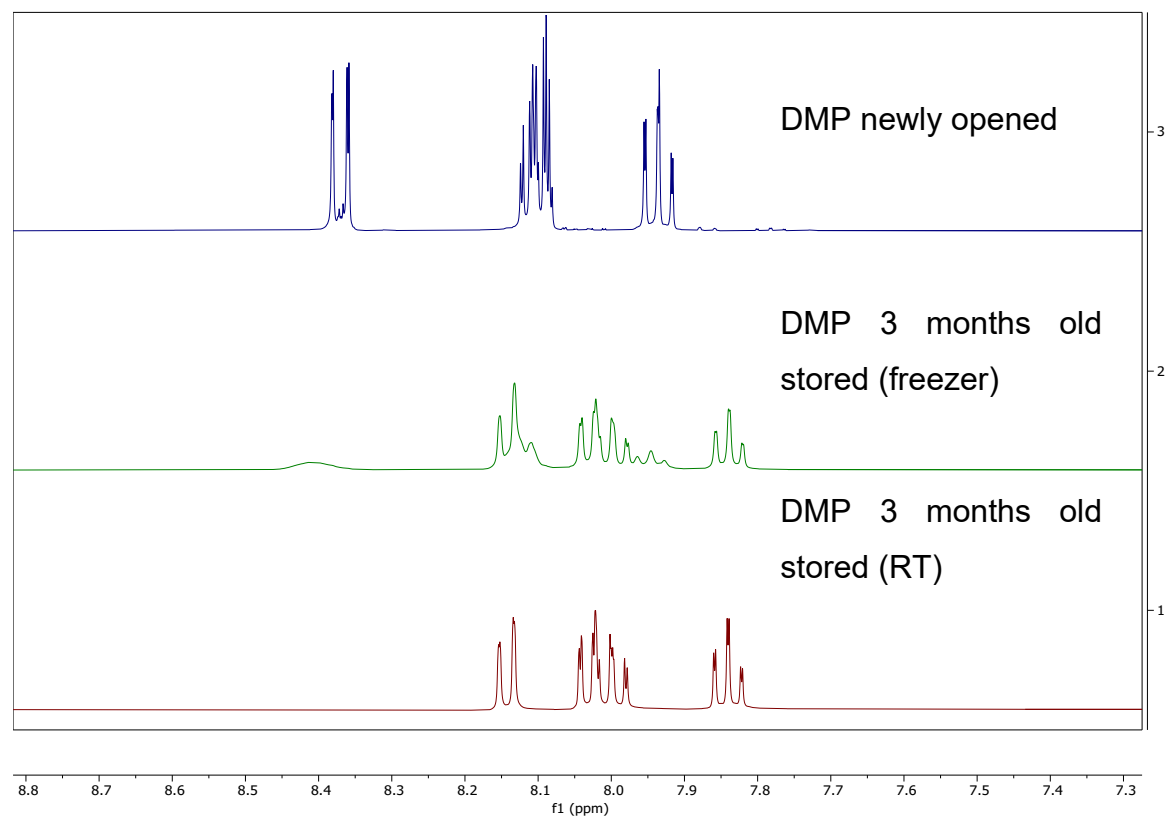



**Figure S4.** Oxidation of compound **1a** with DMP under different conditions.

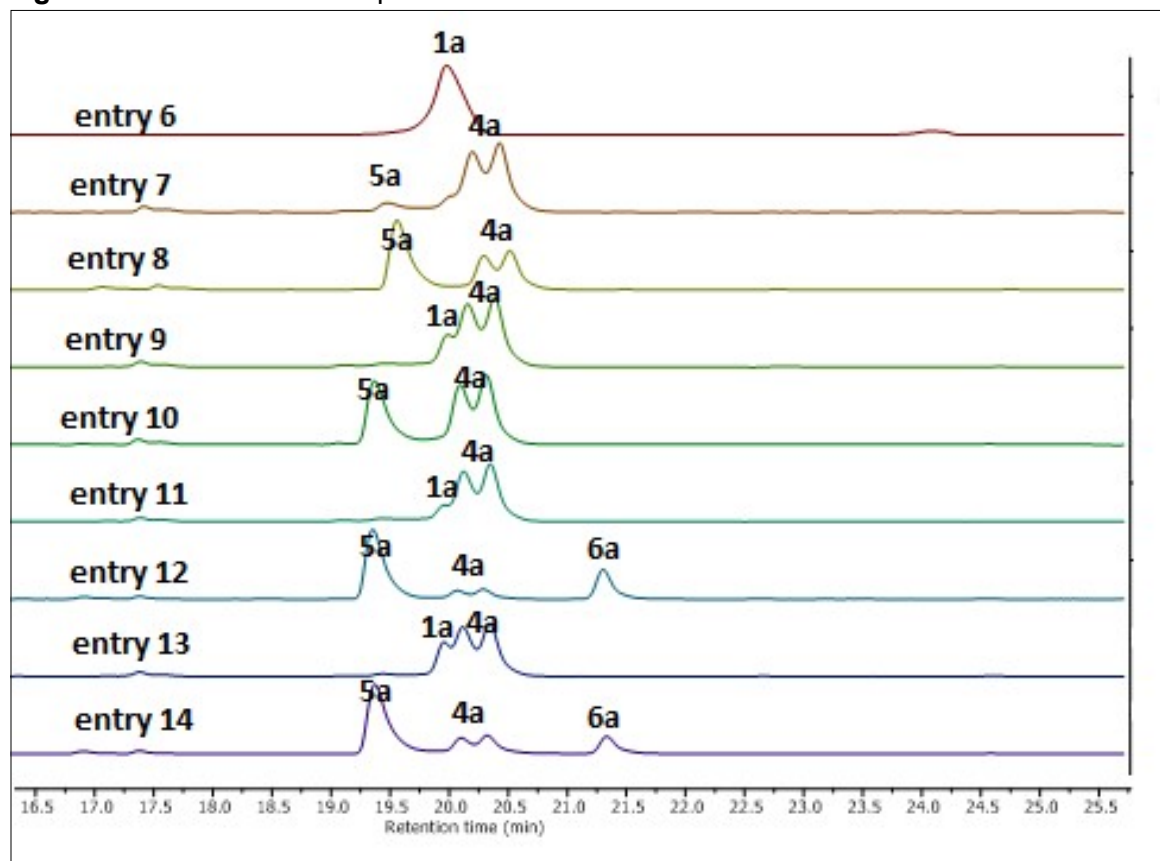

**Table S3.** Oxidation of compound **1a** with 2 eq. DMP. Detected masses and AUC of products by LCMS chromatogram after extraction. LCMS sample prepared in **A)** MeOH; **B)** MeCN

$1a \rightarrow 3a + 5a + 6a$   
 3a: X = H  
 5a: X = OH  
 6a: X = OMe

| Figure | Compound | Retention time (min) | [M+H] <sup>+</sup> | % AUC <sup>1</sup> |
|--------|----------|----------------------|--------------------|--------------------|
| A      | 5a       | 20.01                | 660                | 37                 |
|        | 4a       | 20.98, 21.24         | 676                | 62                 |
| B      | 5a       | 20.14                | 660                | 39                 |
|        | 4a       | 21.00, 21.24         | 676                | 61                 |

<sup>1</sup>Conversion was calculated based on the area under curve (AUC) of compounds from the HPLC chromatogram below and method 1 (**Figure S19**).

**Figure S5.** LCMS chromatogram (diode array detection, method 1, UV 280 nm) of products of oxidation of compound **1a** after extraction. LCMS sample prepared in **A)** MeOH; **B)** MeCN

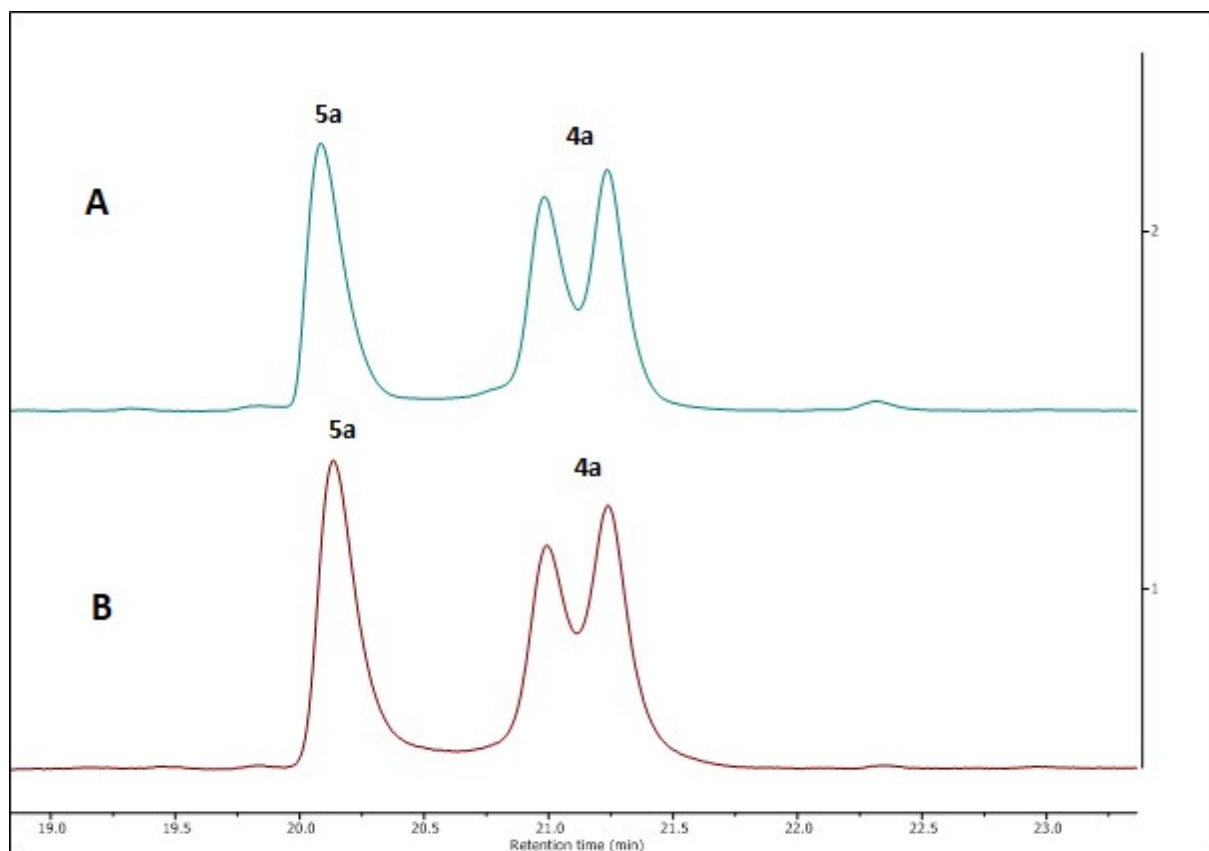

**Figure S6.** LCMS chromatogram of oxidation of compound **1a** with 2 eq. DMP using mobile phase A: 90%water, 10% acetonitrile, 0.1% formic acid; mobile phase B: 10% water, 90% acetonitrile, 0.1% formic acid (diode array detection, method 2, Figure S19, UV 280 nm).

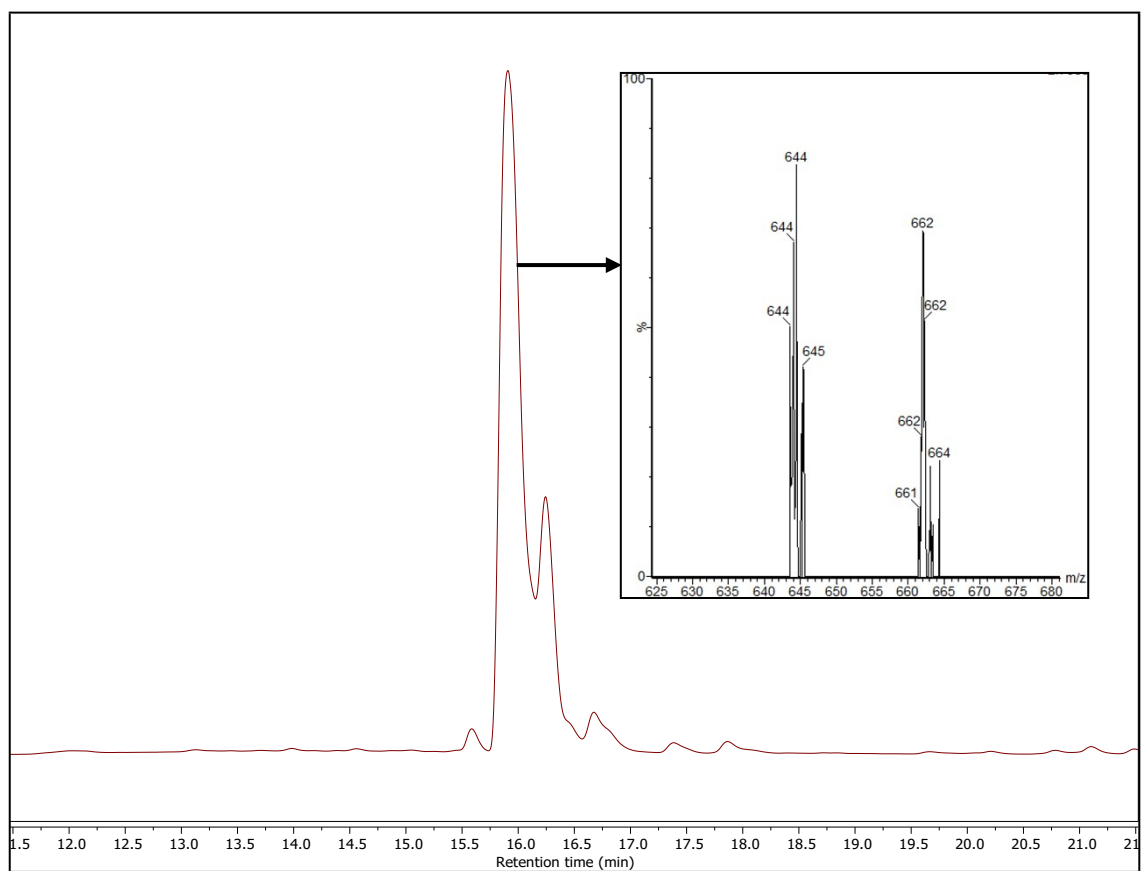

**Figure S7.** Comparison between initial coordinates (low-energy 3D structures) and the coordinates after DFT calculation of **1a** and hydrate intermediate of **3a** showing conformational changes. Initial coordinates of **A1a** (green); **B**) hydrate intermediate of **3a** (cyan); Coordinates after DFT calculation of **C**) **1a** (magenta); **D**) hydrate intermediate of **3a** (purple). Superposed initial coordinates and the coordinates after DFT calculation of **E**) **1a**; **F**) hydrate intermediate of **3a**.

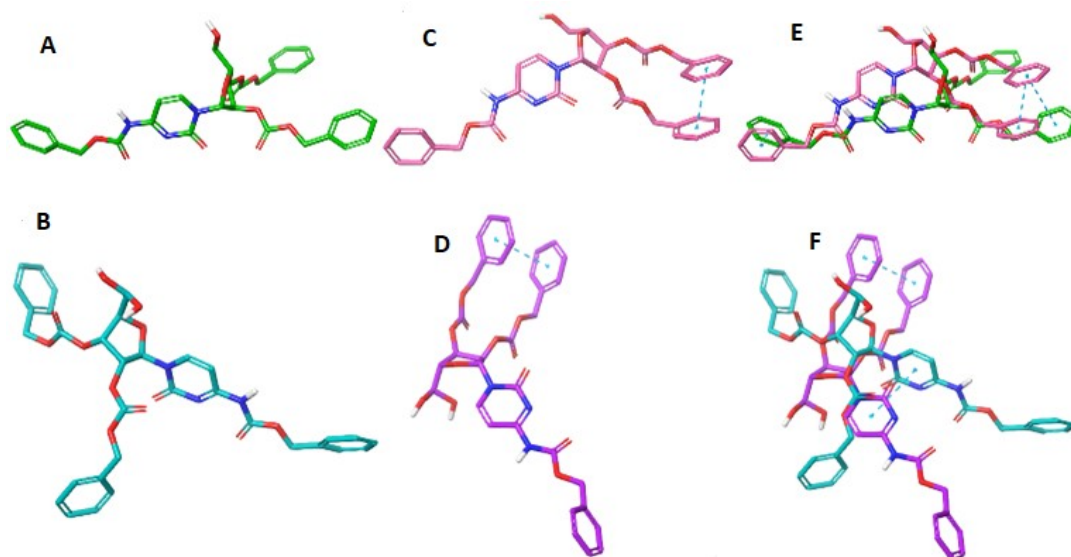

**Figure S8.** RMSD analysis from the 200 ns MD simulations of **1a** (magenta) and the hydrate intermediate of **3a** (purple).

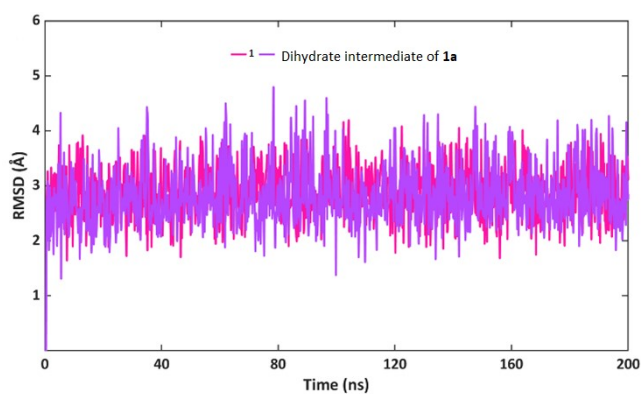

**Figure S9.** MD simulation analysis of **1a** (magenta). **A)** MD pose at the 85<sup>th</sup> ns showing  $\pi$ - $\pi$  stacking between the cytidine ring and one of the Cbz-phenyl rings; **B)** MD pose at the 145<sup>th</sup> ns showing  $\pi$ - $\pi$  stacking between the two phenyl rings of Cbz.

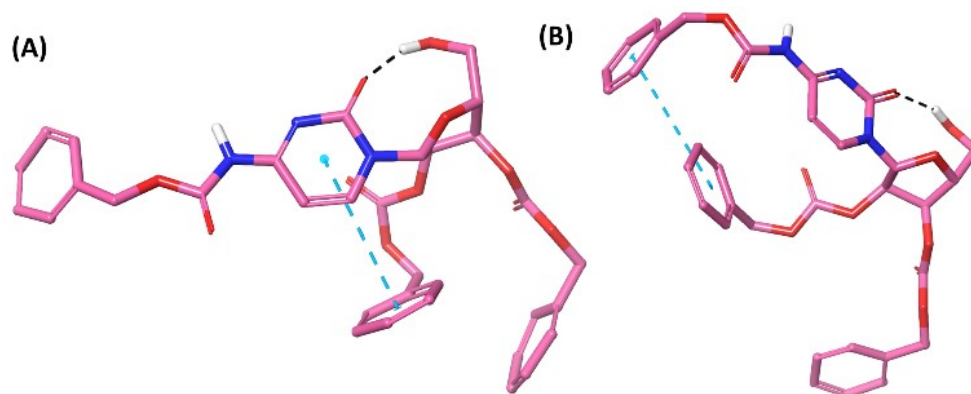

**Figure S10.** MD simulation analysis of the hydrate intermediate of **3a** (purple). MD poses at the **A)** 96<sup>th</sup> ns; **B)** 116<sup>th</sup> ns, showing  $\pi$ - $\pi$  stacking between the two phenyl rings of Cbz.

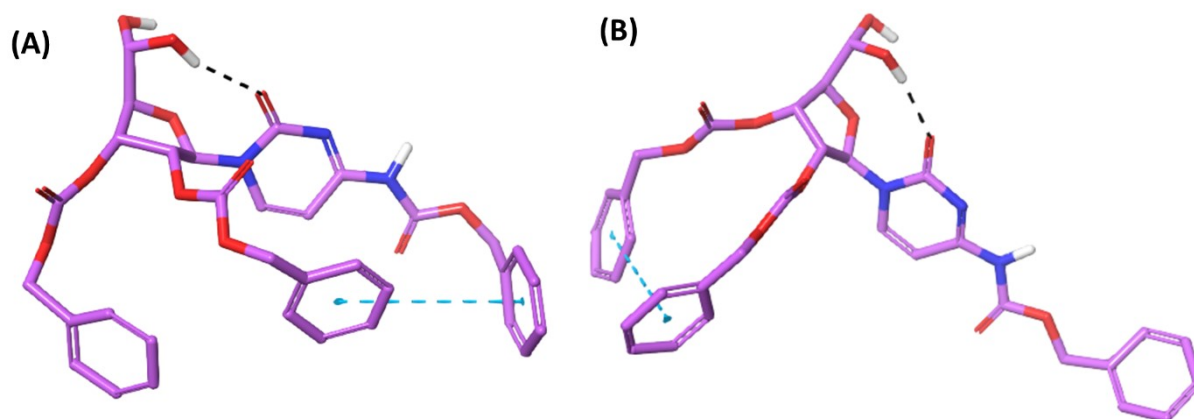

**Table S4.** Oxidation of compound **2**. Detected masses and AUC of products by LCMS chromatogram under different conditions. **A)** 2 eq. of new DMP, **B)** 4 eq. of new DMP

7: X = H  
8: X = OH  
9: X = OMe

| Figure | Compound | Retention time (min) | [M+H] <sup>+</sup> | % AUC <sup>1</sup> |
|--------|----------|----------------------|--------------------|--------------------|
| A      | 8        | 10.76                | 510                | 41                 |
|        | 10       | 10.78, 10.84         | 526                | 59                 |
| B      | 8        | 10.74                | 510                | > 95               |

<sup>1</sup>Conversion was calculated based on the area under curve (AUC) of compounds from the HPLC chromatogram below and method 2 (Figure S19).

**Figure S11.** LCMS chromatogram (diode array detection, method 2, UV 280 nm) of products of oxidation of compound **2** under different conditions

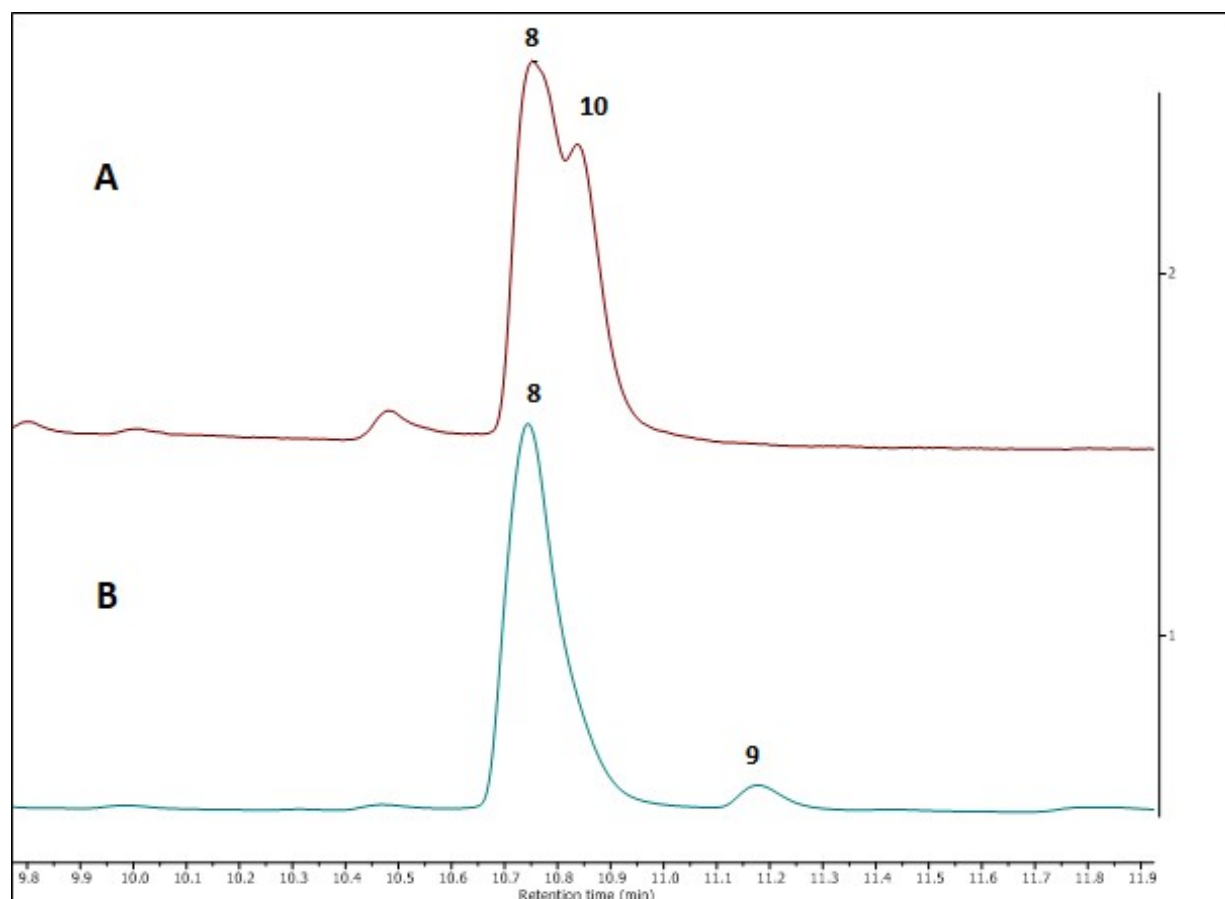

**Table S5.** Oxidation of compound **1c**. Detected masses and AUC of products by LCMS chromatogram under different conditions. **A)** 2 eq. of new DMP, **B)** 4 eq. of new DMP

$1c \rightarrow 3c + 5c + 4c$   
**3c:** X = H  
**5c:** X = OH  
**6c:** X = OMe

| Figure   | Compound  | Retention time (min) | [M+H] <sup>+</sup> | % AUC <sup>1</sup> |
|----------|-----------|----------------------|--------------------|--------------------|
| <b>A</b> | <b>4c</b> | 9.18, 9.28           | 356                | 100                |
| <b>B</b> | <b>5c</b> | 8.96                 | 340                | 42                 |
|          | <b>4c</b> | 9.16, 9.38           | 356                | 58                 |

<sup>1</sup>Conversion was calculated based on the area under curve (AUC) of compounds from the HPLC chromatogram below and method 1 (**Figure S19**).

**Figure S12.** LCMS chromatogram (diode array detection, method 1, UV 280 nm) of products of oxidation of compounds **1c** under different conditions.

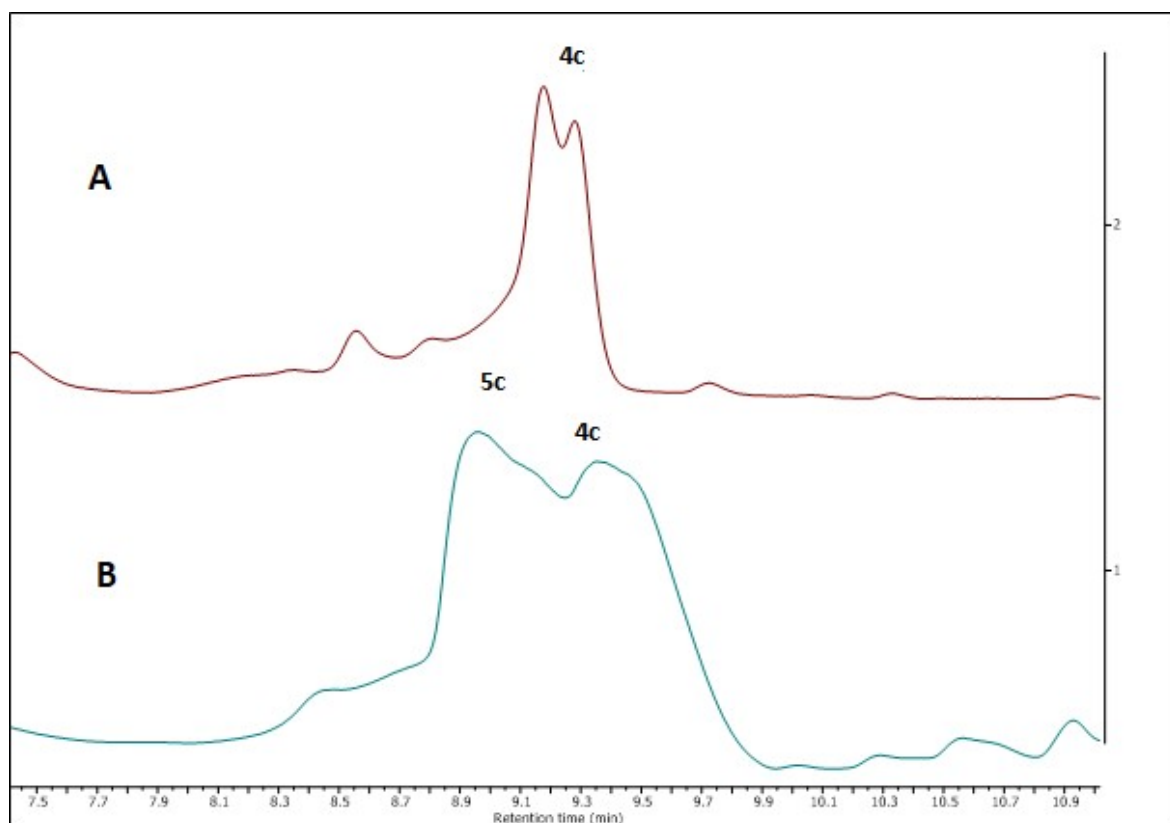

**Figure S13A.**  $^1\text{H}$  NMR spectra (400 MHz,  $\text{CDCl}_3$ ) of aldehyde **3c** (purified by column chromatogram; residue of org. phase added directly to the column chromatography on silica gel)

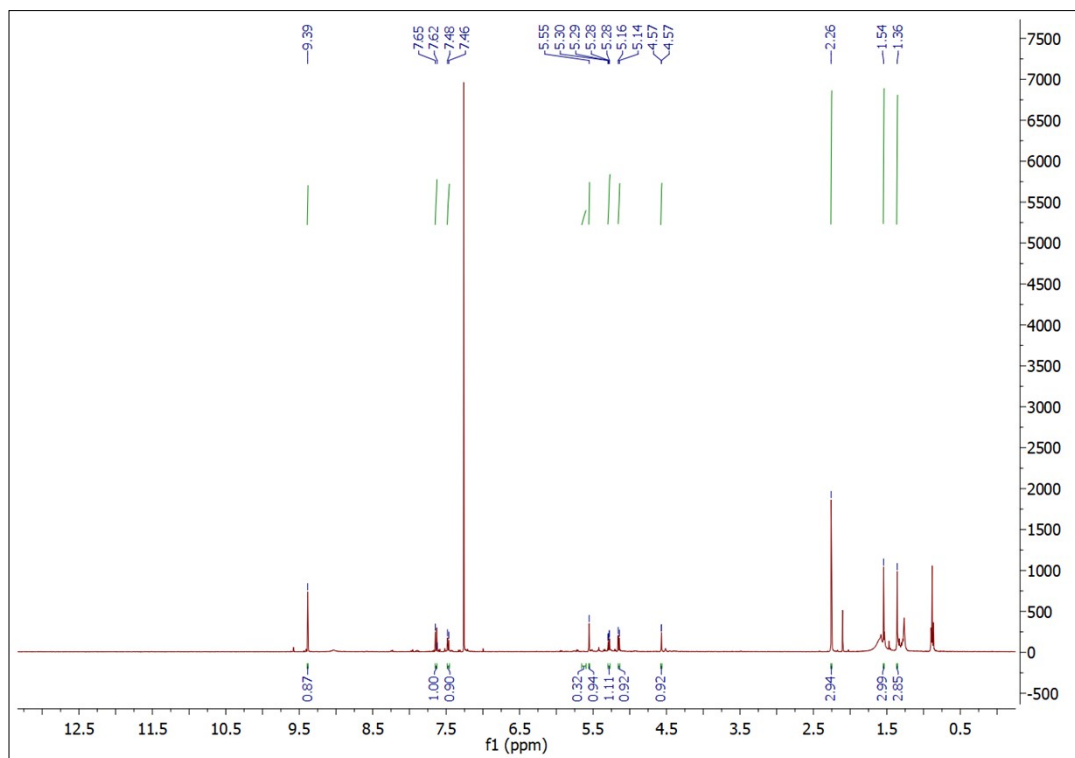

**Figure S13B.**  $^1\text{H}$  NMR spectra (400 MHz,  $\text{CDCl}_3$ ) of mixture aldehyde **3c** and methyl hemiacetal **4c** (purified by column chromatogram; residue of org. phase redissolved in dichloromethane and methanol with silica gel before addition to the column chromatographic on silica gel)

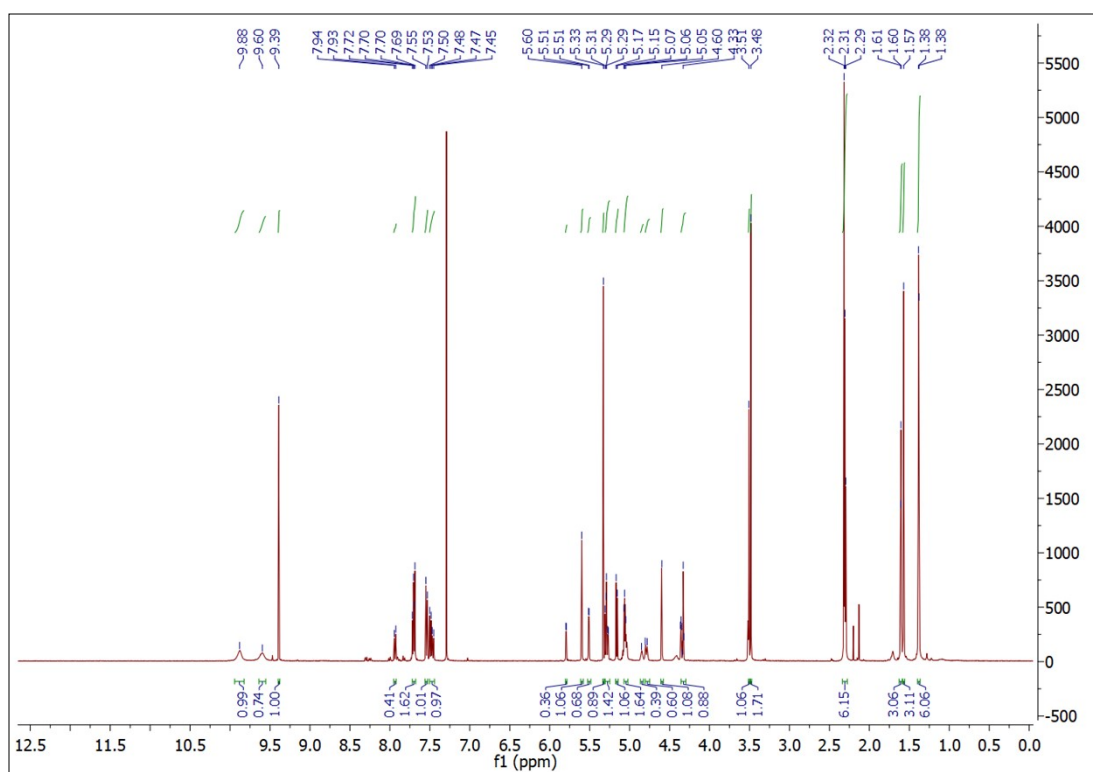



**Figure S14.** Comparison between **A)** initial coordinates (low-energy 3D structures) of cytidine analogue **1c** and **B)** its coordinate after DFT calculation; **C)** superposed initial coordinates and the coordinates after DFT calculation of **1c**.

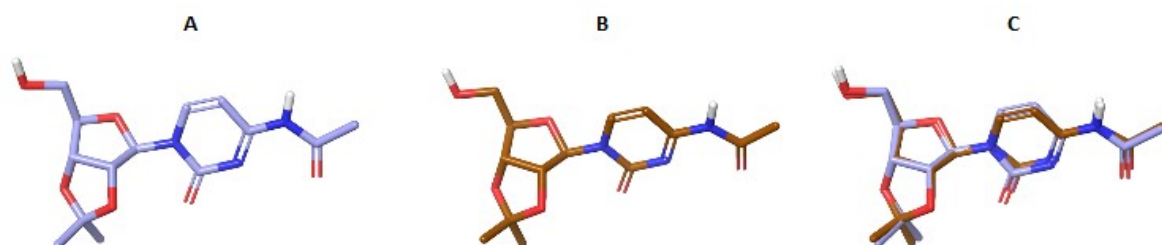

**Table S6.** Oxidation of compound **1b**. Detected masses and AUC of products by LCMS chromatogram under different conditions **A**) 2 eq. of new DMP, **B**) 4 eq. of new DMP

$1b \rightarrow 3b + 5b + 4b$

$3b: X = H$   
 $5b: X = OH$   
 $6b: X = OMe$

| Figure   | Compound  | Retention time (min) | [M+H] <sup>+</sup> | % AUC <sup>1</sup> |
|----------|-----------|----------------------|--------------------|--------------------|
| <b>A</b> | <b>3b</b> | 11.96                | 470                | 50                 |
|          | <b>5b</b> | 12.14                | 486                | 7                  |
|          | <b>4b</b> | 12.23                | 502                | 43                 |
| <b>B</b> | <b>5b</b> | 12.05                | 486                | 96                 |
|          | <b>4b</b> | 12.30                | 502                | 4                  |

<sup>1</sup>Conversion was calculated based on the area under curve (AUC) of compounds from the HPLC chromatogram below and method 2 (**Figure S19**).

**Figure S15.** LCMS chromatogram (diode array detection, method 2, UV 280 nm) of products of oxidation of compounds **1b** under different conditions.

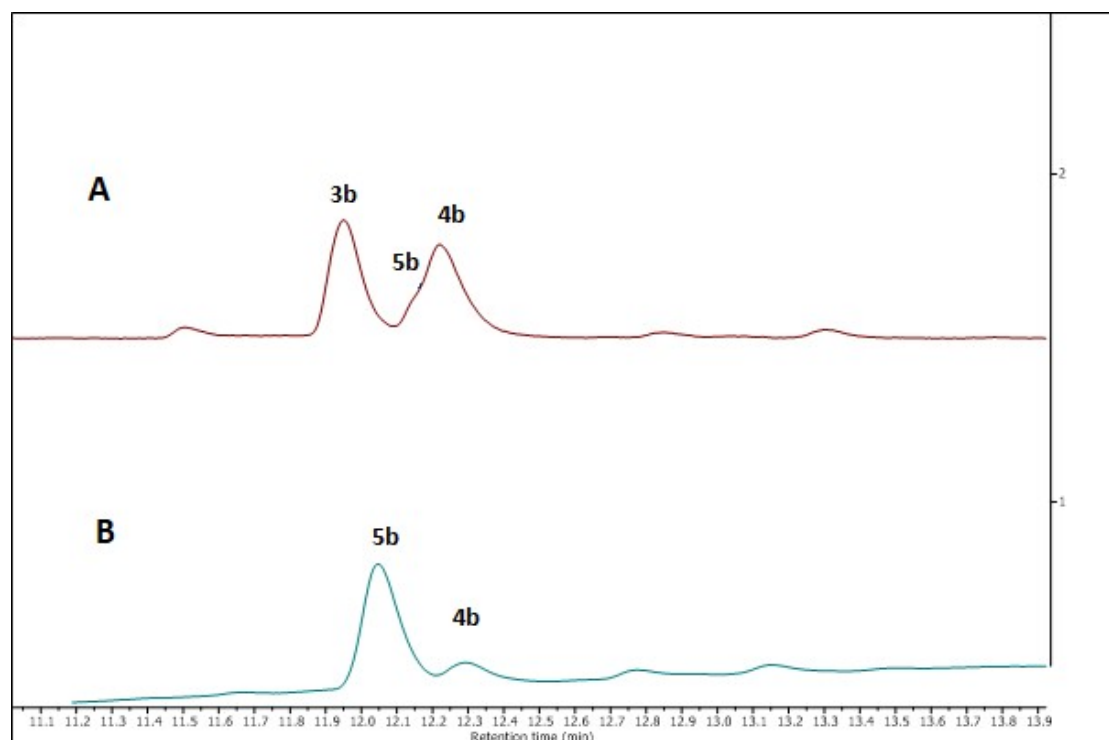

**Figure S16.** Representative structures from the MD simulations of **A)** cytidine analogue **1a**; **B)** hydrate intermediate of **3a**; **C)** cytidine analogue **1c**

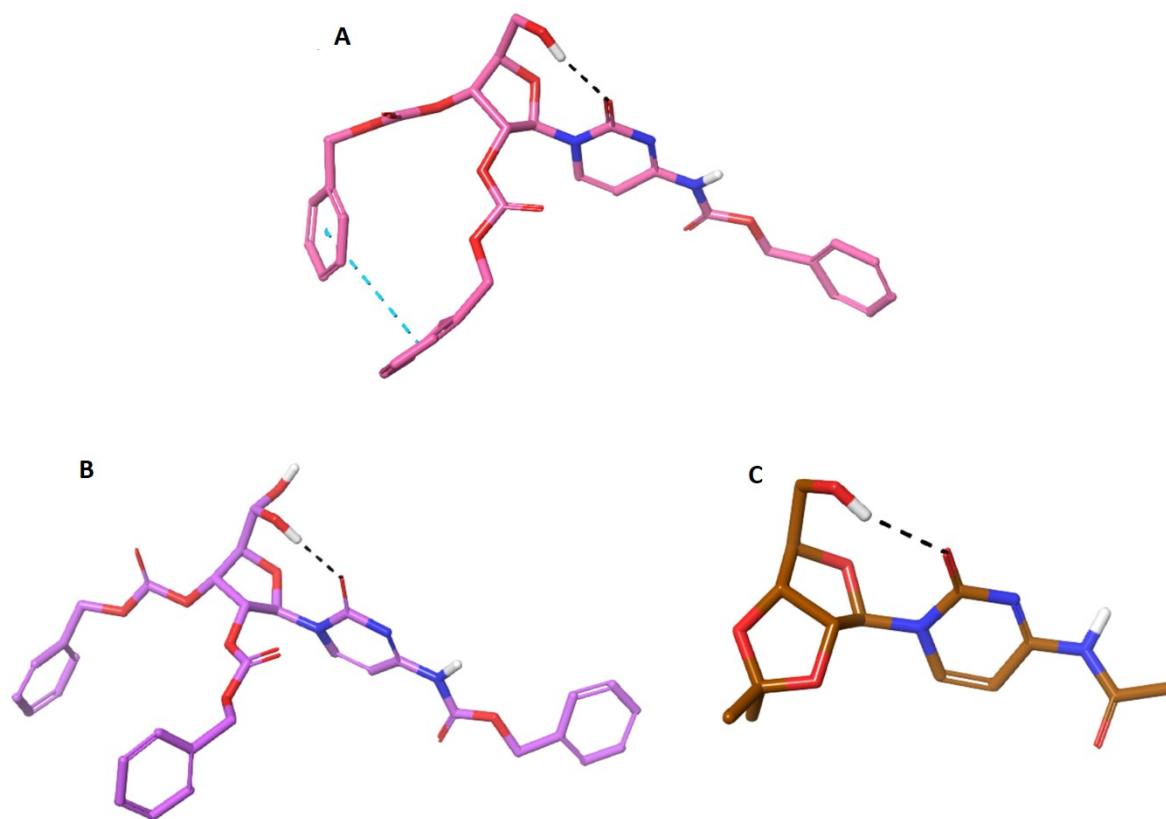

**Figure S17.**  $^1\text{H}$  NMR spectra (400 MHz,  $\text{CDCl}_3$ ) of **A)** methyl riboside **11**; **B)** methyl riboside **11** with 2 eq. DMP; **C)** methyl riboside **11** with 4 eq. DMP.

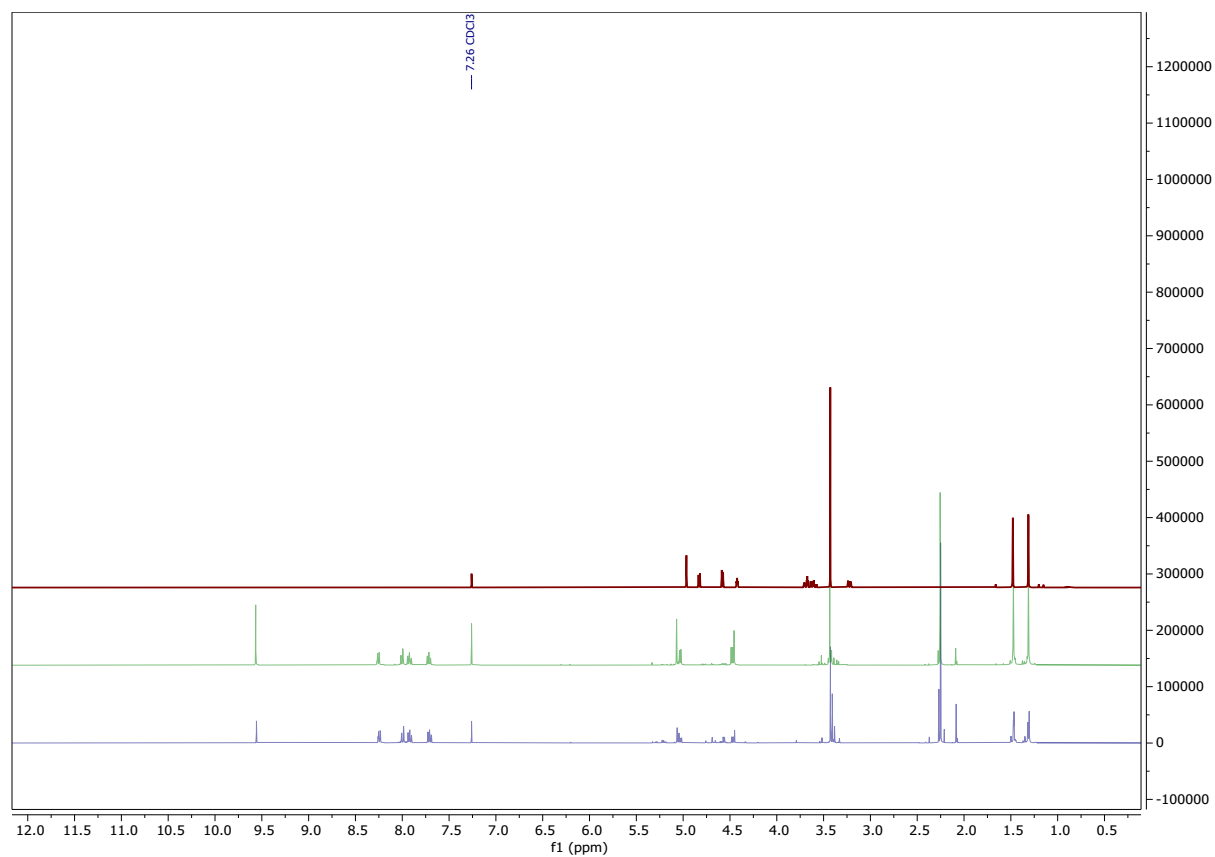

**Table S7.** Oxidation of methyl riboside **12**. Detected masses and AUC of products by LCMS chromatogram under different conditions **A**) 2 eq. of new DMP, **B**) 4 eq. of new DMP

12  $\longrightarrow$  14: X = H  
16: X = OH  
17: X = OMe

| Figure   | Compound  | Retention time (min) | [M+H] <sup>+</sup> | % AUC <sup>1</sup> |
|----------|-----------|----------------------|--------------------|--------------------|
| <b>A</b> | <b>18</b> | 18.86, 19.28         | 463                | 43                 |
|          | <b>16</b> | 19.13                | 447                | 57                 |
| <b>B</b> | <b>18</b> | 18.83                | 463                | 9                  |
|          | <b>16</b> | 19.04                | 447                | 81                 |

<sup>1</sup>Conversion was calculated based on the area under curve (AUC) of compounds from the HPLC chromatogram below and method 1 (Figure S19)

**Figure S18.** LCMS chromatogram (diode array detection, method 1, UV 280 nm) of products of oxidation of methyl riboside **12** under different conditions.

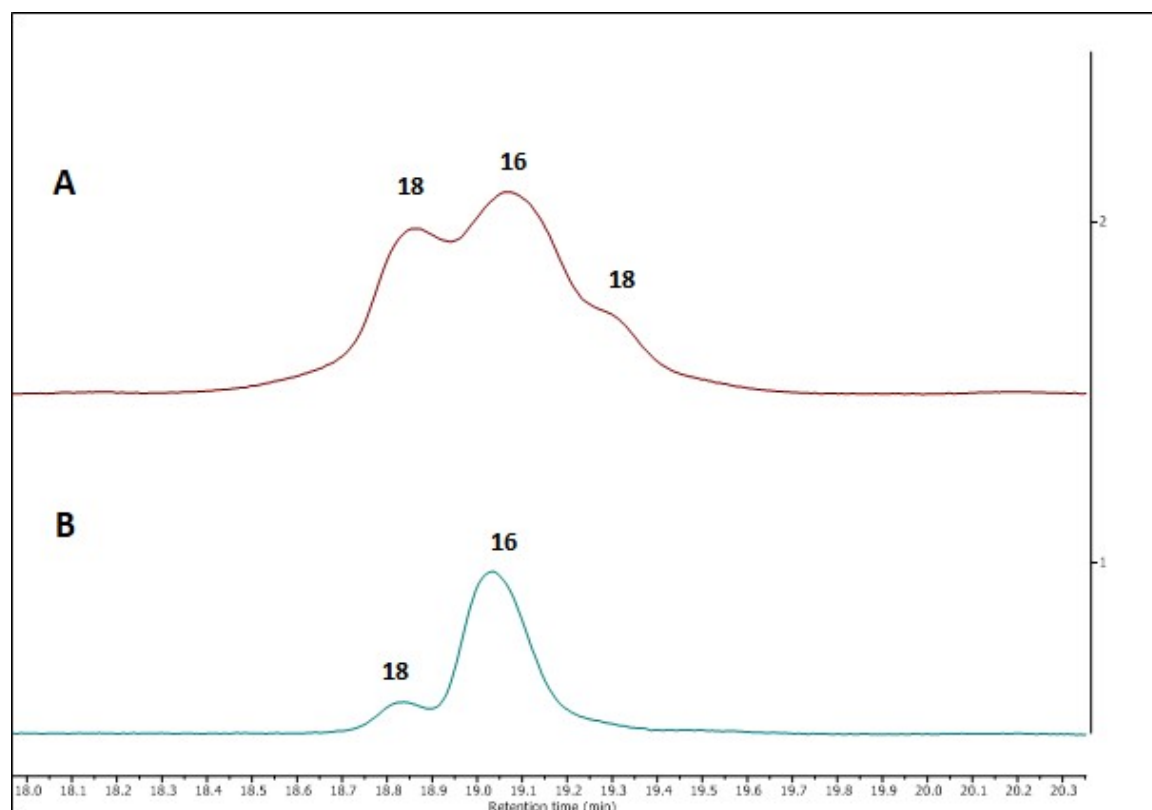

**Figure S19.** LCMS gradient

mobile phase A: 90% water, 10% MeOH, 0.1% formic acid;

mobile phase B: 90% MeOH, 10% water, 0.1% Formic acid;

flow: 0.25 ml/min;

**Method 1:**

| Time (min) | Mobile Phase A (%) | Mobile Phase B (%) |
|------------|--------------------|--------------------|
| 0          | 95                 | 5                  |
| 5          | 95                 | 5                  |
| 10         | 30                 | 70                 |
| 20         | 10                 | 90                 |
| 25         | 0                  | 100                |
| 30         | 0                  | 100                |
| 32         | 95                 | 5                  |
| 35         | 95                 | 5                  |

**Method 2:**

| Time (min) | Mobile Phase A (%) | Mobile Phase B (%) |
|------------|--------------------|--------------------|
| 0          | 95                 | 5                  |
| 3          | 95                 | 5                  |
| 5          | 0                  | 100                |
| 30         | 0                  | 100                |
| 32         | 95                 | 5                  |
| 35         | 95                 | 5                  |

**Figure S20** Characterisation of compound **5a**

<sup>1</sup>H NMR spectra of compound **5a** (400 MHz, DMSO-d<sub>6</sub>)

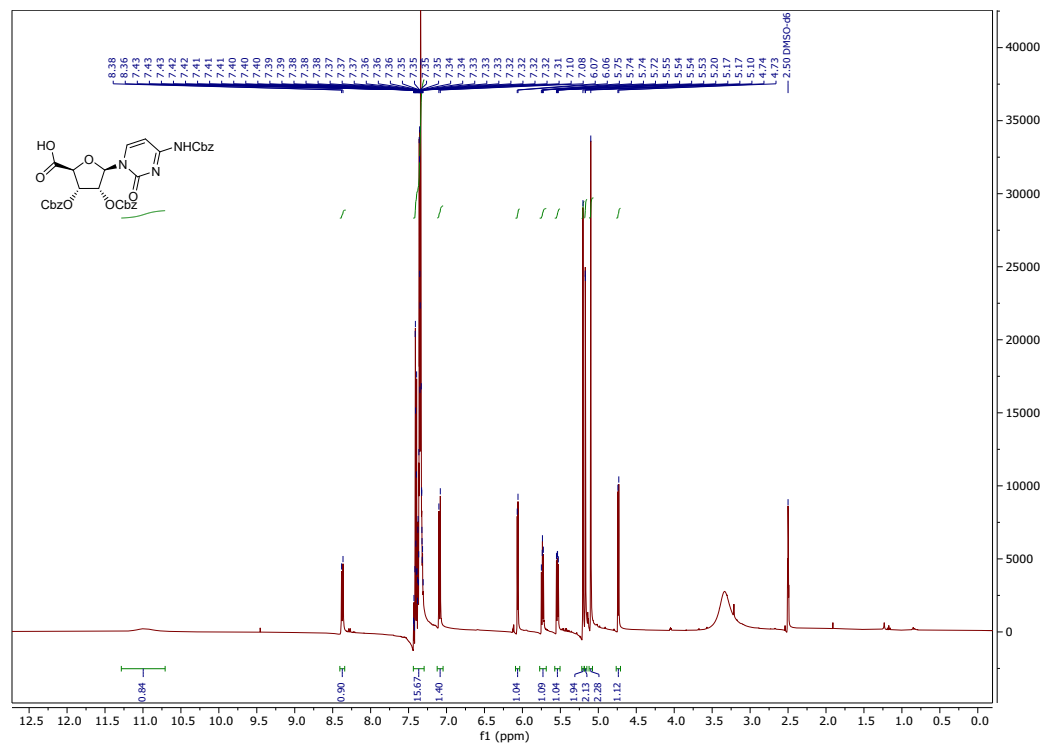

<sup>13</sup>C{<sup>1</sup>H} NMR of compound **5a** (100 MHz, DMSO-d<sub>6</sub>)

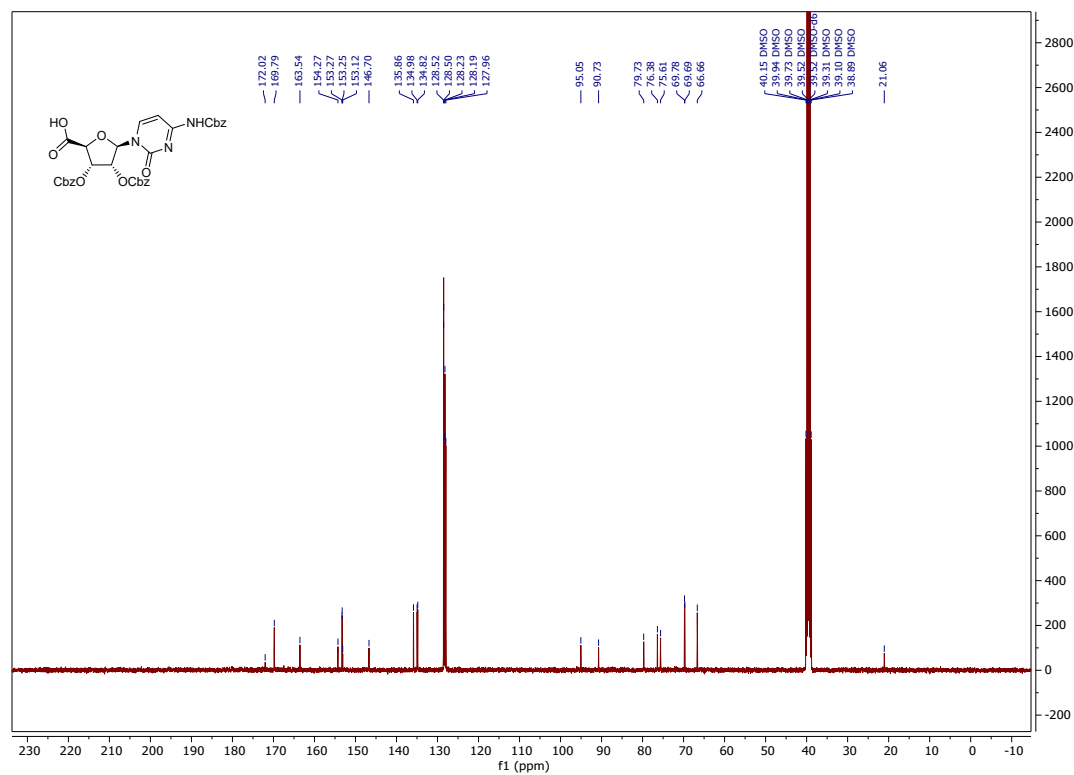

LC chromatogram and MS spectrum of compound **5a**

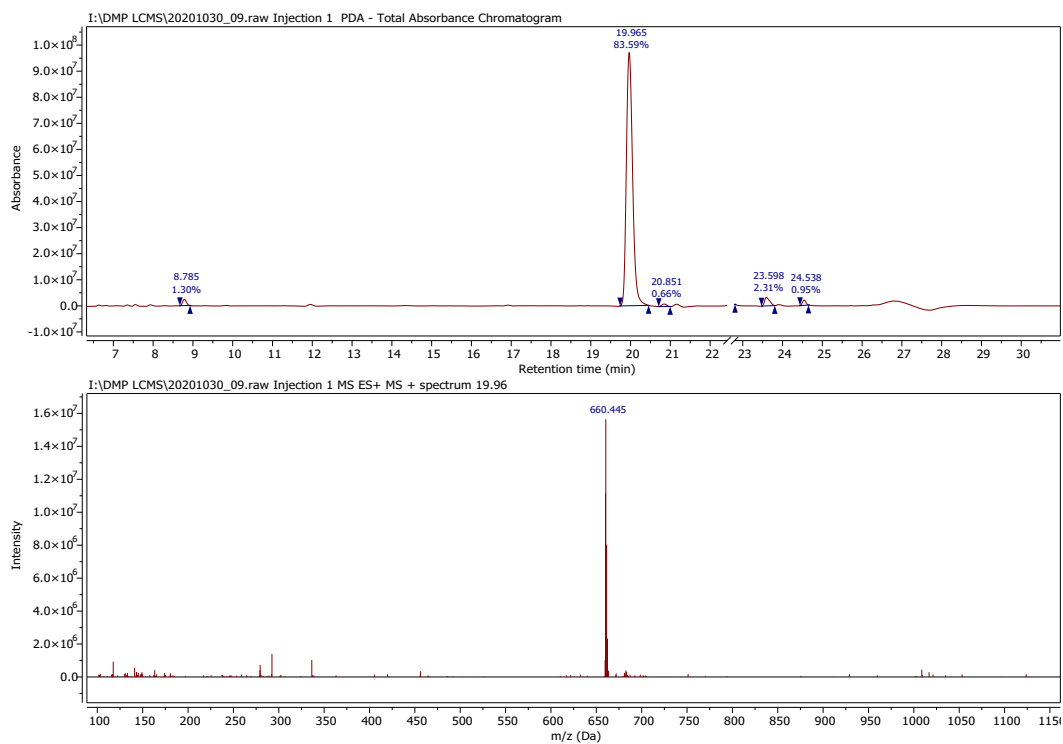

HRMS spectrum of compound **5a**

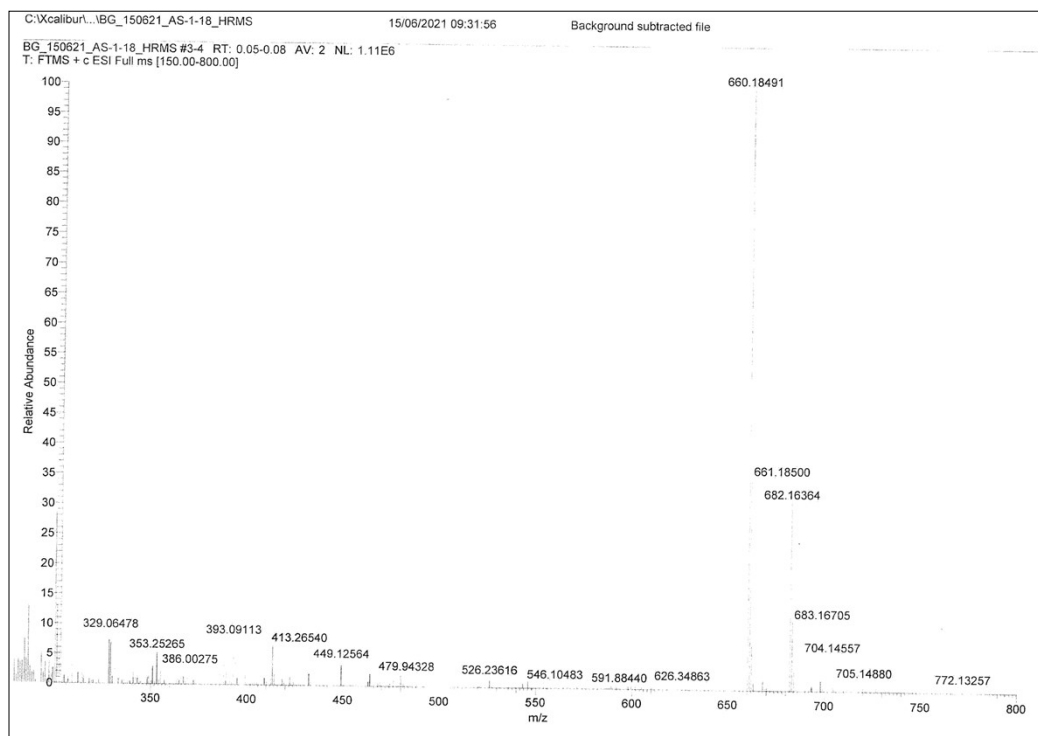

Figure S21 Characterisation of compound **6a**



$^1\text{H}$  NMR spectra of compound **6a** (400 MHz,  $\text{CDCl}_3$ )

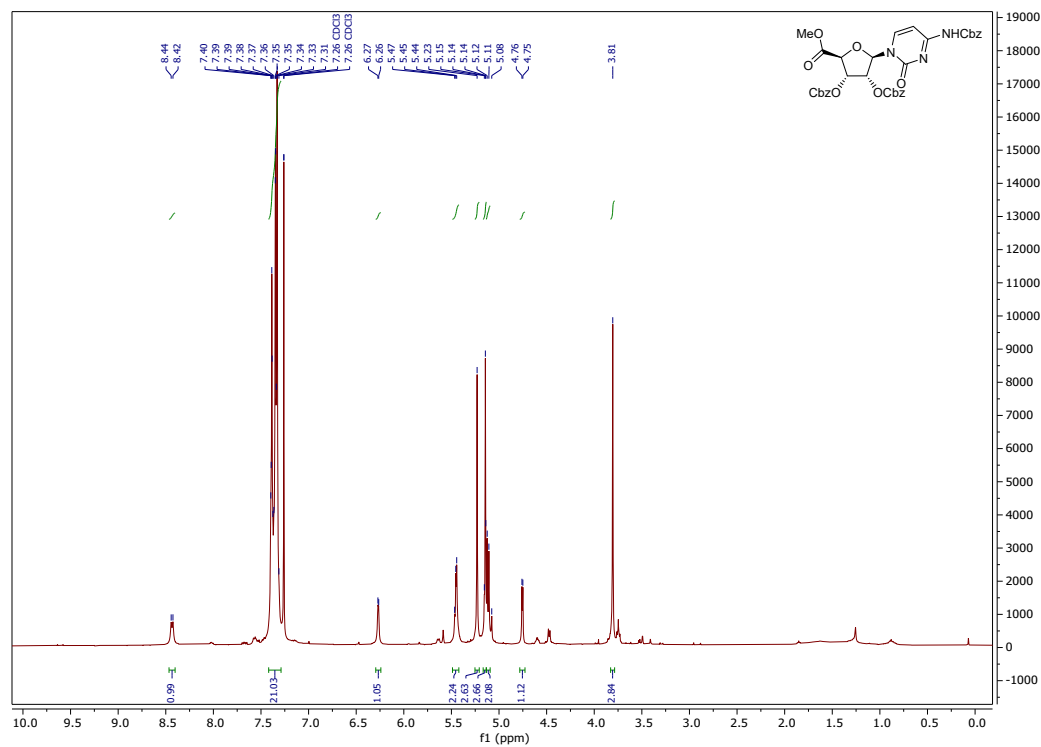

$^{13}\text{C}\{^1\text{H}\}$  NMR of compound **6a** (100 MHz,  $\text{CDCl}_3$ )

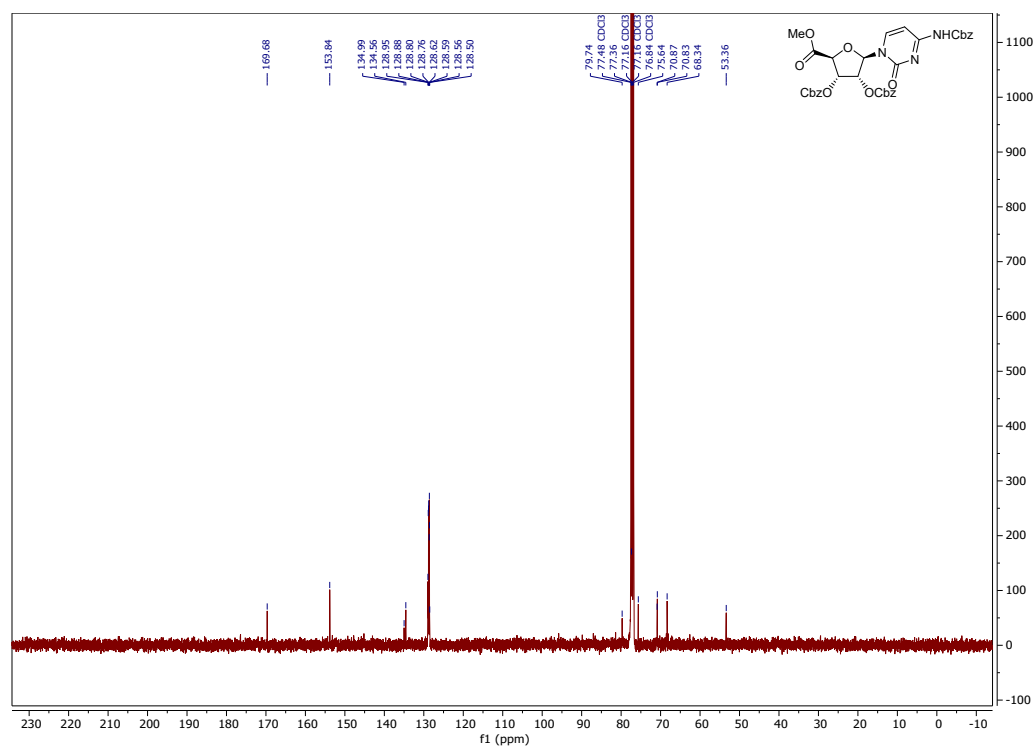

LC chromatogram and MS spectrum of compound **6a**

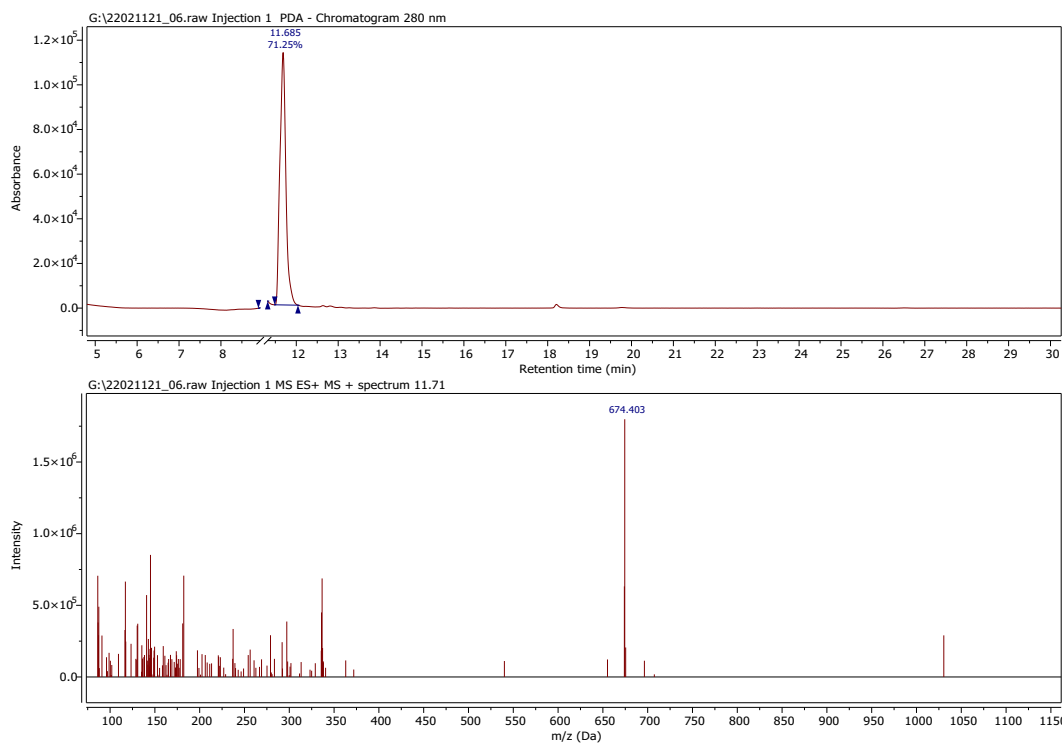

### HRMS spectrum of compound 6a

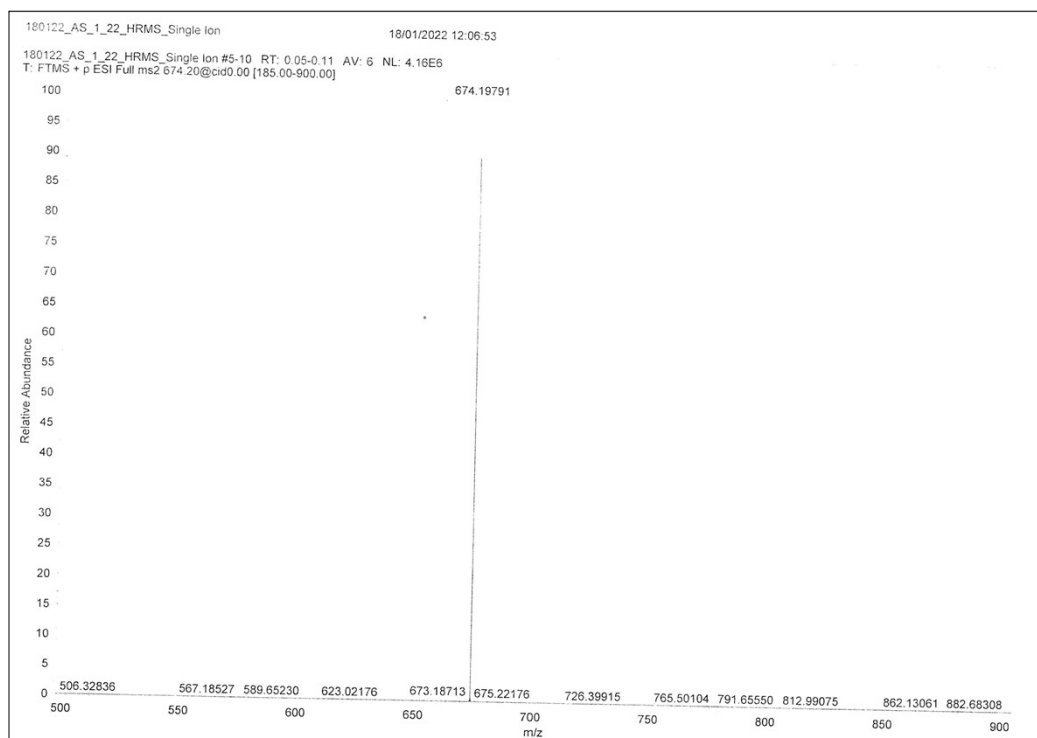

### Figure S22 Characterisation of compound 2

### $^1\text{H}$ NMR spectra of compound **2** (400 MHz, $\text{CDCl}_3$ )

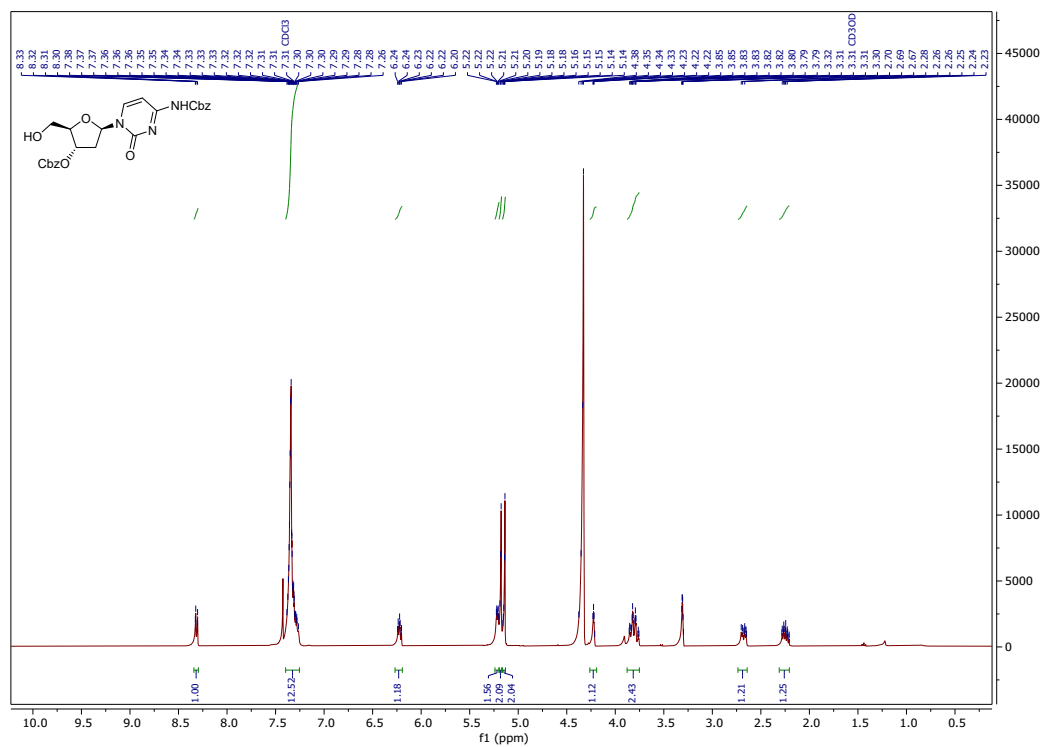

### $^{13}\text{C}\{^1\text{H}\}$ NMR of compound **2** (100 MHz, $\text{CDCl}_3$ )

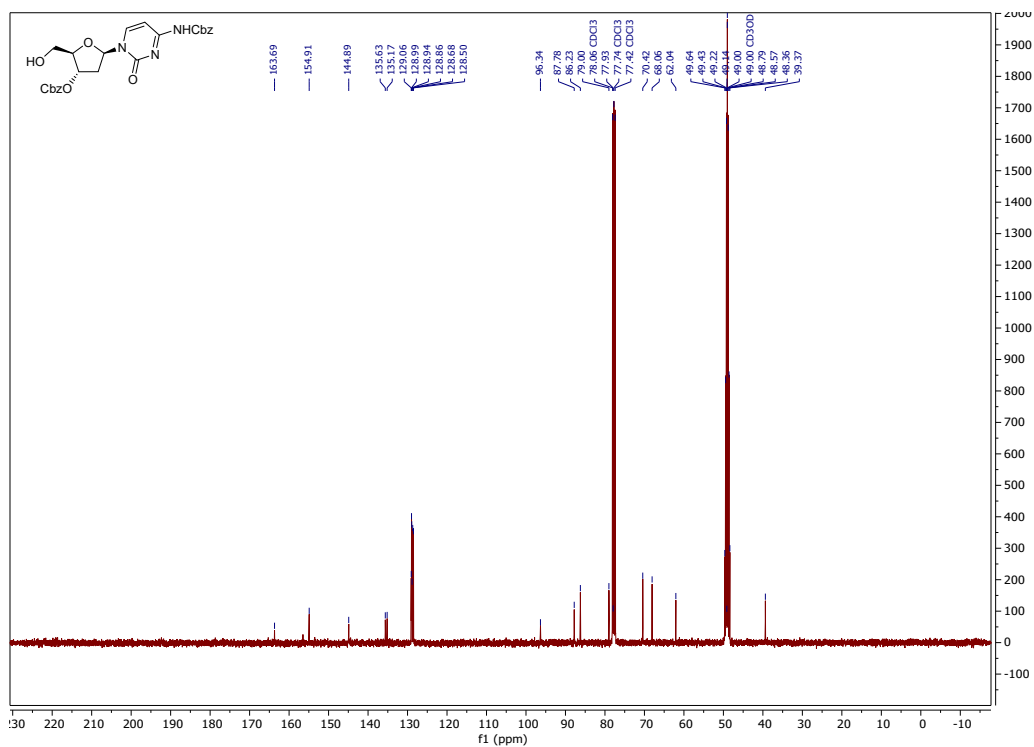

### LC chromatogram and MS spectrum of compound **2**

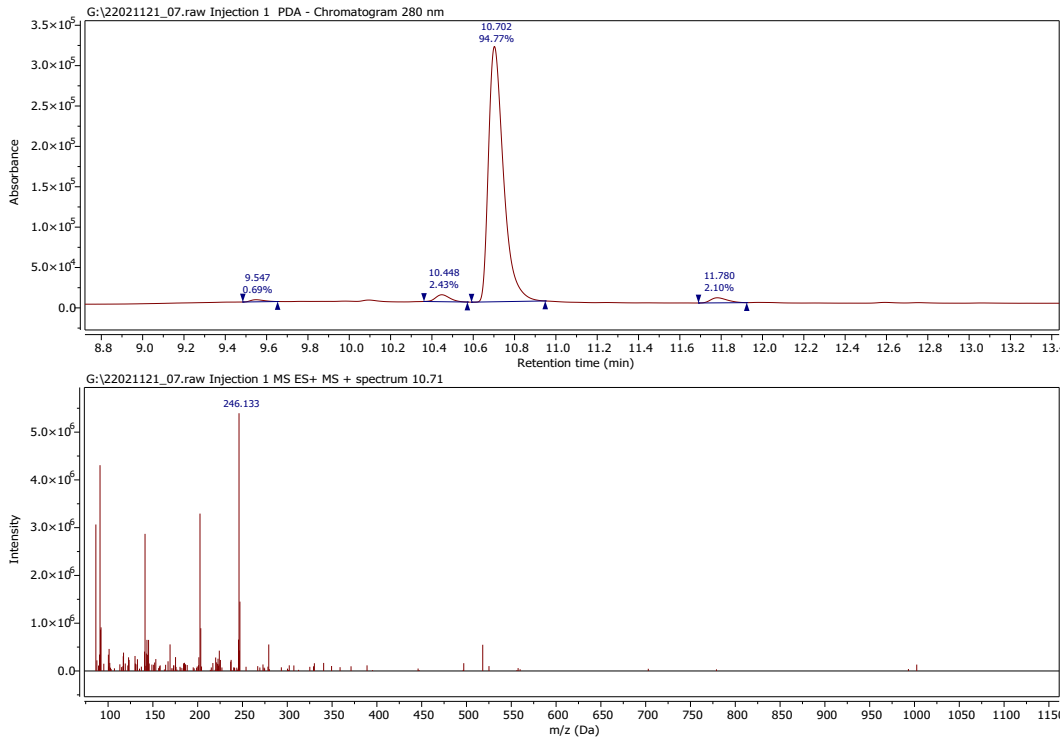

## HRMS spectrum of compound 2

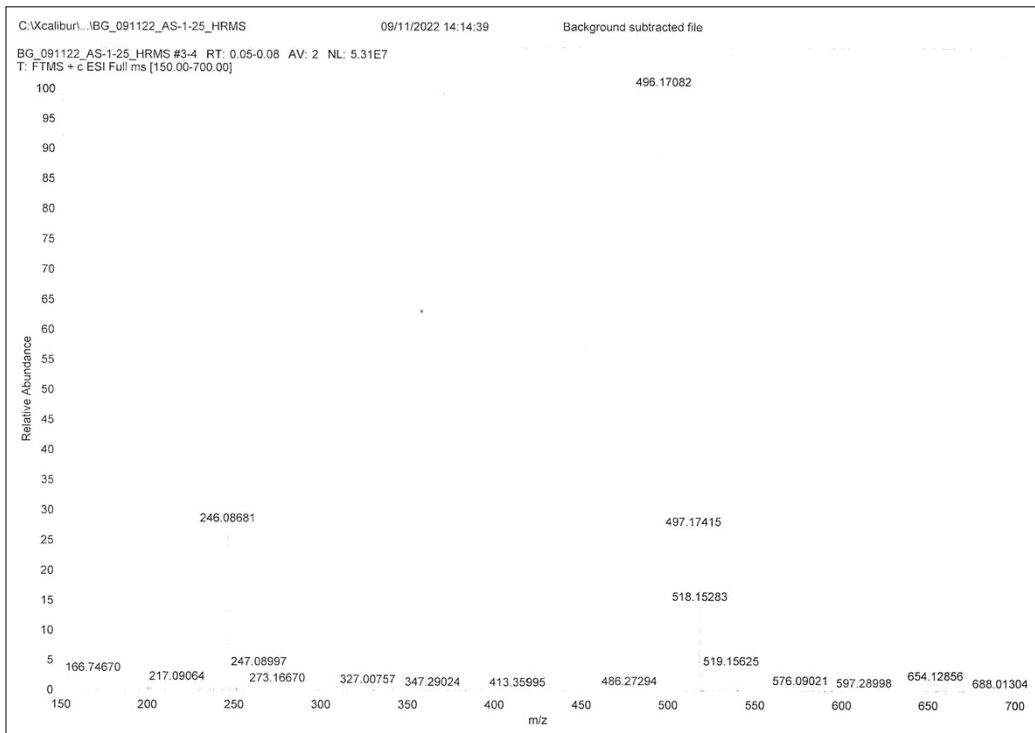

Supplement: d4ob00240g1.pdf [file d4ob00240g1.pdf]
